# Supplementary material for: Mining Google and Apple mobility data: temporal anatomy for COVID-19 social distancing
Source: PubMed Central journal article supplement (PMC7892828; doi:10.1038/s41598-021-83441-4), 2021-02-18
Supplement: 41598_2021_83441_MOESM1_ESM.pdf [file 41598_2021_83441_MOESM1_ESM.pdf]

# Mining Google and Apple mobility data: Temporal Anatomy for COVID-19 Social Distancing

Corentin Cot<sup>1,2,+</sup>, Giacomo Cacciapaglia<sup>1,2,\*,+</sup>, and Francesco Sannino<sup>3,4,+</sup>

<sup>1</sup>Institut de Physique des 2 Infinis (IP2I), CNRS/IN2P3, UMR5822, 69622 Villeurbanne, France

<sup>2</sup>Université de Lyon, Université Claude Bernard Lyon 1, 69001 Lyon, France

<sup>3</sup>CP3-Origins & the Danish Institute for Advanced Study, University of Southern Denmark, Campusvej 55, DK-5230 Odense, Denmark

<sup>4</sup>Dipartimento di Fisica E. Pancini, Università di Napoli Federico II & INFN sezione di Napoli, Complesso Universitario di Monte S. Angelo Edificio 6, via Cintia, 80126 Napoli, Italy

\*g.cacciapaglia@ipnl.in2p3.fr

+these authors contributed equally to this work

## ABSTRACT

We employ the Google and Apple mobility data to identify, quantify and classify different degrees of social distancing and characterise their imprint on the first wave of the COVID-19 pandemic in Europe and in the United States. We identify the period of enacted social distancing via Google and Apple data, independently from the political decisions. Our analysis allows us to classify different shades of social distancing measures for the first wave of the pandemic. We observe a strong decrease in the infection rate occurring two to five weeks after the onset of mobility reduction. A universal time scale emerges, after which social distancing shows its impact. We further provide an actual measure of the impact of social distancing for each region, showing that the effect amounts to a reduction by 20% – 40% in the infection rate in Europe and 30% – 70% in the US.

## Supplementary figures and tables

| Fit parameters: first wave and 6-week average mobility variations in Europe |     |           |           |                       |       |      |       |       |
|-----------------------------------------------------------------------------|-----|-----------|-----------|-----------------------|-------|------|-------|-------|
| Country                                                                     | ISO | $a$       | $\gamma$  | $b$                   | Work. | Res. | Driv. | Walk. |
| France                                                                      | FRA | 7.641(5)  | 0.690(8)  | $1.20(3) \times 10^3$ | -65   | 28   | -73   | -82   |
| Italy                                                                       | ITA | 8.185(11) | 0.536(12) | 106(3)                | -62   | 29   | -71   | -76   |
| Spain                                                                       | ESP | 8.432(6)  | 0.769(11) | $1.88(5) \times 10^3$ | -66   | 28   | -80   | -87   |
| United Kingdom                                                              | GBR | 8.293(8)  | 0.407(6)  | 65(2)                 | -59   | 23   | -58   | -55   |
| Germany                                                                     | DEU | 7.580(7)  | 0.722(12) | $1.58(4) \times 10^3$ | -39   | 14   | -43   | -40   |
| Denmark                                                                     | DNK | 7.591(13) | 0.458(11) | 42(2)                 | -45   | 15   | -29   | -35   |
| Switzerland                                                                 | CHE | 8.142(3)  | 0.794(8)  | $2.45(4) \times 10^3$ | -45   | 20   | -40   | -40   |
| Sweden                                                                      | SWE | 8.07(3)   | 0.392(9)  | 52.6(7)               | -28   | 10   | -9.1  | -27   |
| Slovakia                                                                    | SVK | 6.00(6)   | 0.44(2)   | 139(7)                | -45   | 17   | -46   | -47   |
| Portugal                                                                    | PRT | 7.90(1)   | 0.648(14) | $9.5(4) \times 10^2$  | -59   | 30   | -75   | -84   |
| Poland                                                                      | POL | 6.01(2)   | 0.588(15) | $9.6(4) \times 10^2$  | -41   | 17   | -59   | -70   |
| Ireland                                                                     | IRL | 8.541(7)  | 0.612(11) | $9.8(5) \times 10^2$  | -60   | 25   | -61   | -66   |
| Netherlands                                                                 | NLD | 7.884(6)  | 0.555(7)  | 277(5)                | -43   | 16   | -48   | -47   |
| Romania                                                                     | ROU | 6.877(17) | 0.461(12) | 176(8)                | -46   | 17   | -66   | -73   |
| Bulgaria                                                                    | BGR | 6.13(2)   | 0.326(8)  | 40(2)                 | -42   | 16   | -64   | -68   |
| Croatia                                                                     | HRV | 6.25(1)   | 0.78(2)   | $4.7(2) \times 10^3$  | -52   | 19   | -66   | -64   |
| Norway                                                                      | NOR | 7.261(6)  | 0.710(13) | $0.84(2) \times 10^3$ | -46   | 16   | -30   | -37   |
| Austria                                                                     | AUT | 7.410(6)  | 1.07(2)   | $5.9(2) \times 10^4$  | -53   | 20   | -56   | -64   |
| Hungary                                                                     | HUN | 5.961(11) | 0.55(1)   | $6.5(3) \times 10^2$  | -42   | 17   | -48   | -69   |
| Serbia                                                                      | SRB | 7.399(7)  | 0.658(9)  | $2.68(9) \times 10^3$ | -59   | 20   | -68   | -71   |
| Belgium                                                                     | BEL | 8.498(8)  | 0.585(8)  | 338(7)                | -57   | 24   | -56   | -43   |

**Table T1. First wave fits and average mobility reductions in Europe.** Values of the fit for  $a$ ,  $b$  and  $\gamma$  for the first wave in the 21 European countries considered in this study, together with the 95% CL error. Six week average mobility reduction for Google and Apple categories.

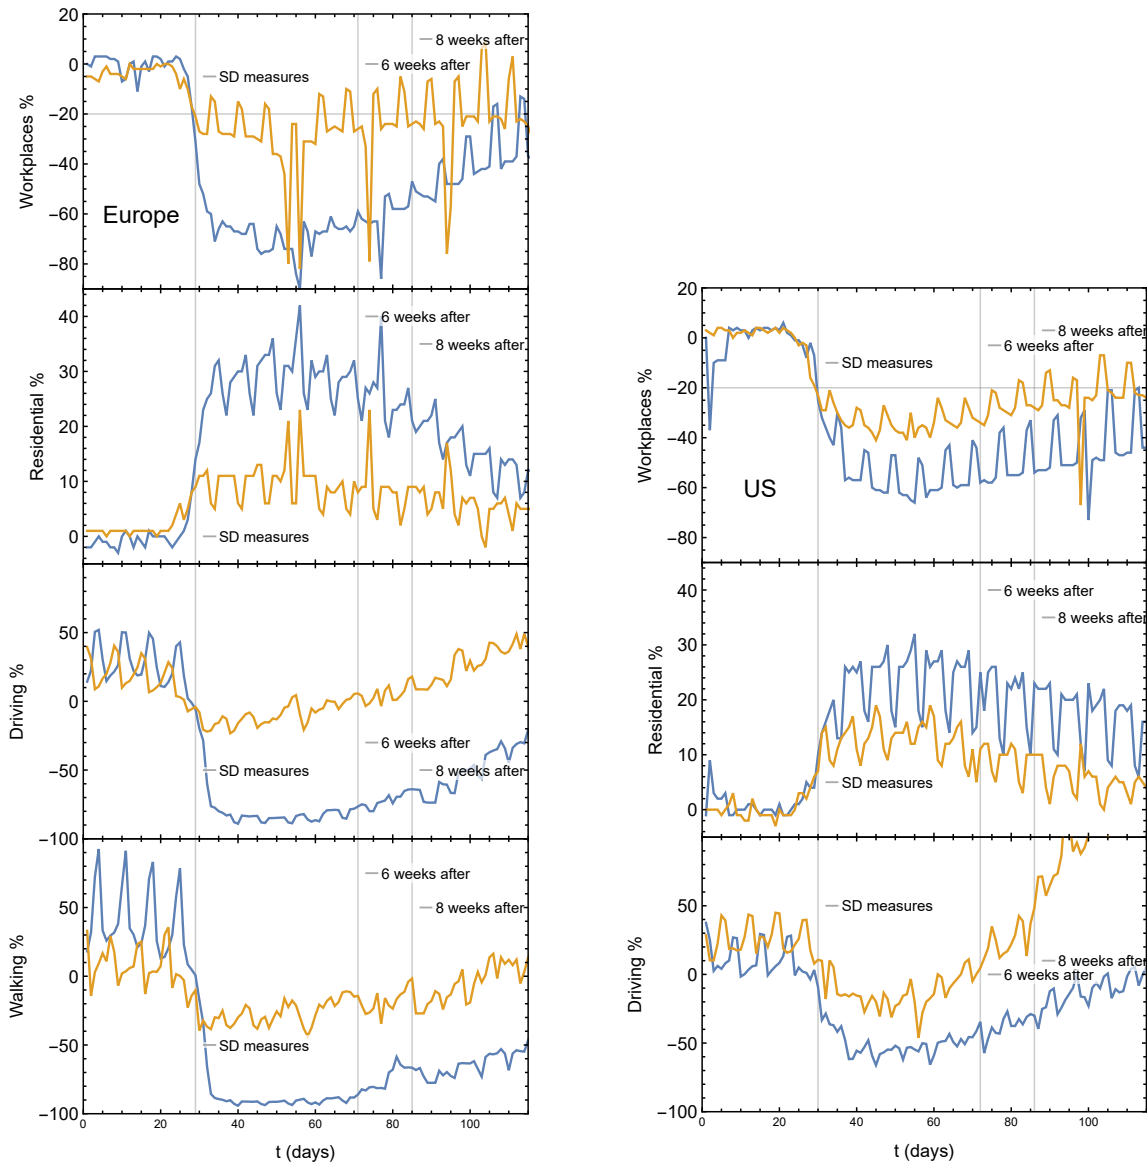

**Figure S1. Raw Google and Mobility data.** In these plots we show a sample of raw Google and Apple mobility data used in this work, for Europe (left) and the US (right). The time scale is shifted so that the beginning of the social distancing, defined by a 20% drop in Google’s Workplace and indicated by the first vertical grey line, coincides for all countries and states. The other two vertical lines mark the end of the 6 and 8 week averaging periods respectively. We show the respective HM region in orange and the LM one in blue: for Europe, Sweden (orange) and Spain (blue); for the US, Wyoming (orange) and New York (blue).

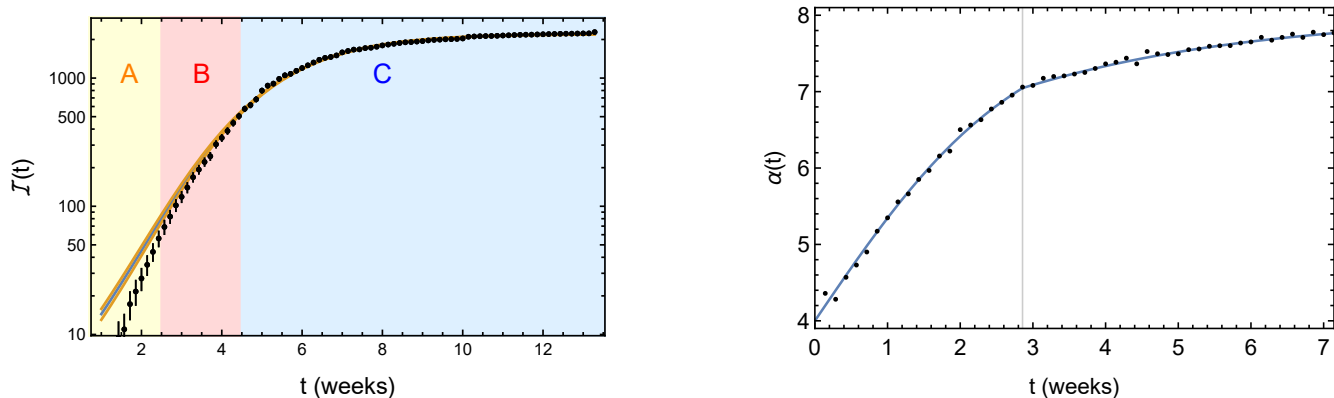

**Figure S2. Temporal anatomy of the first wave epidemic data.** Left panel: schema of the 3 temporal regions defined in the text. A refers to the pre-measure time, B occurs between the start of the social distancing and the change in  $\gamma$ , C covers the later times, after the measure effects occur. The duration of B is defined as  $\Delta t$ . Right panel: generating function (solid) and sample of the simulated points for the two-gamma model.

| Fit parameters: two-gamma function parameters in Europe |     |           |            |            |                       |            |
|---------------------------------------------------------|-----|-----------|------------|------------|-----------------------|------------|
| Country                                                 | ISO | $a$       | $\gamma_B$ | $\gamma_C$ | $b$                   | $\Delta t$ |
| France                                                  | FRA | 7.663(9)  | 0.715(13)  | 0.64(2)    | $1.65(4) \times 10^3$ | 2.6(2)     |
| Italy                                                   | ITA | 8.304(9)  | 0.591(6)   | 0.386(8)   | 215(3)                | 2.88(4)    |
| Spain                                                   | ESP | 8.483(9)  | 0.79(1)    | 0.62(2)    | $2.68(5) \times 10^3$ | 2.74(8)    |
| United Kingdom                                          | GBR | 8.339(4)  | 0.549(9)   | 0.363(3)   | 429(9)                | 2.78(5)    |
| Germany                                                 | DEU | 7.637(15) | 0.726(13)  | 0.57(3)    | $1.75(4) \times 10^3$ | 2.84(11)   |
| Denmark                                                 | DNK | 8.06(11)  | 0.38(2)    | 0.18(2)    | 24(1)                 | 4.60(6)    |
| Switzerland                                             | CHE | 8.158(7)  | 0.80(1)    | 0.71(3)    | $2.53(4) \times 10^3$ | 2.8(2)     |
| Sweden                                                  | SWE | 8.51(11)  | 0.353(12)  | 0.26(2)    | 39(1)                 | 3.57(8)    |
| Slovakia                                                | SVK | 6.04(7)   | 0.56(25)   | 0.43(3)    | $5(2) \times 10^2$    | 1.4(1.2)   |
| Portugal                                                | PRT | 7.95(1)   | 0.80(2)    | 0.548(14)  | $6.7(4) \times 10^3$  | 2.61(8)    |
| Poland                                                  | POL | 6.25(3)   | 0.622(12)  | 0.416(16)  | $1.70(5) \times 10^3$ | 3.07(5)    |
| Ireland                                                 | IRL | 8.70(4)   | 0.52(2)    | 0.26(4)    | 337(15)               | 6.26(9)    |
| Netherlands                                             | NLD | 7.900(5)  | 0.67(3)    | 0.528(7)   | $1.18(5) \times 10^3$ | 1.91(14)   |
| Romania                                                 | ROU | 7.04(2)   | 0.557(13)  | 0.34(1)    | $7.0(3) \times 10^2$  | 3.87(7)    |
| Bulgaria                                                | BGR | 6.15(2)   | 0.86(31)   | 0.32(8)    | $1.9(7) \times 10^4$  | 1.3(2)     |
| Croatia                                                 | HRV | 6.296(8)  | 1.04(4)    | 0.672(15)  | $1.07(7) \times 10^5$ | 1.89(7)    |
| Norway                                                  | NOR | 7.42(4)   | 0.62(2)    | 0.32(4)    | 349(6)                | 3.54(5)    |
| Austria                                                 | AUT | 7.462(12) | 1.060(17)  | 0.75(5)    | $6.1(2) \times 10^4$  | 2.35(7)    |
| Hungary                                                 | HUN | 5.972(11) | 0.95(22)   | 0.54(1)    | $8(3) \times 10^4$    | 1.5(2)     |
| Serbia                                                  | SRB | 7.44(3)   | 0.641(14)  | 0.55(5)    | $2.18(8) \times 10^3$ | 5.14(18)   |
| Belgium                                                 | BEL | 8.481(17) | 0.585(11)  | 0.62(4)    | 335.15(8)             | 3.7(6)     |

**Table T2. First wave fits for the two-gamma model for Europe.** Outcome of the two-gamma fits for the 5 parameters  $a$ ,  $\gamma_B$ ,  $\gamma_C$ ,  $b$  and  $\Delta t$ . The errors refer to a 95% CL.

| Fit parameters: first wave and 6-week average mobility variations in the US |    |           |            |                       |       |      |       |
|-----------------------------------------------------------------------------|----|-----------|------------|-----------------------|-------|------|-------|
| State                                                                       |    | $a$       | $\gamma$   | $b$                   | Work. | Res. | Driv. |
| Alabama                                                                     | AL | 7.92(5)   | 0.40(2)    | 74(4)                 | -35   | 14   | -23   |
| Alaska                                                                      | AK | 6.196(7)  | 0.89(2)    | $2.1(2) \times 10^4$  | -36   | 14   | -23   |
| Arizona                                                                     | AZ | 8.28(7)   | 0.266(12)  | 17.5(6)               | -40   | 15   | -36   |
| Arkansas                                                                    | AR | 7.72(9)   | 0.37(2)    | 63(3)                 | -32   | 11   | -20   |
| California                                                                  | CA | 8.44(4)   | 0.243(8)   | 12.3(5)               | -46   | 20   | -48   |
| Colorado                                                                    | CO | 8.01(1)   | 0.331(6)   | 31(1)                 | -47   | 18   | -46   |
| Connecticut                                                                 | CT | 9.124(4)  | 0.413(6)   | 73(3)                 | -45   | 19   | -40   |
| Delaware                                                                    | DE | 7.577(7)  | 0.399(5)   | 121(4)                | -43   | 17   | -35   |
| Florida                                                                     | FL | 9.76(2)   | 0.335(14)  | 20(2)                 | -42   | 17   | -46   |
| Georgia                                                                     | GA | 11.21(2)  | 0.316(9)   | 16.3(7)               | -41   | 16   | -32   |
| Hawaii                                                                      | HI | 6.578(2)  | 0.919(11)  | $2.81(8) \times 10^4$ | -45   | 20   | -62   |
| Idaho                                                                       | ID | 7.751(16) | 0.71(4)    | $2.2(3) \times 10^3$  | -38   | 12   | -15   |
| Illinois                                                                    | IL | 8.93(3)   | 0.322(8)   | 34(2)                 | -45   | 19   | -38   |
| Indiana                                                                     | IN | 8.312(12) | 0.331(6)   | 35(2)                 | -41   | 16   | -30   |
| Iowa                                                                        | IA | 9.721(13) | 0.415(7)   | 169(8)                | -34   | 14   | -22   |
| Kansas                                                                      | KS | 9.12(7)   | 0.335(17)  | 53(4)                 | -37   | 14   | -29   |
| Kentucky                                                                    | KY | 6.71(3)   | 0.395(13)  | 120(6)                | -39   | 14   | -26   |
| Louisiana                                                                   | LA | 8.424(11) | 0.82(3)    | $8(1) \times 10^3$    | -39   | 15   | -46   |
| Maine                                                                       | ME | 7.237(11) | 0.195(3)   | 6.7(2)                | -39   | 15   | -35   |
| Maryland                                                                    | MD | 10.170(7) | 0.293(3)   | 21.2(5)               | -47   | 20   | -40   |
| Massachusetts                                                               | MA | 10.110(3) | 0.405(4)   | 64(2)                 | -51   | 22   | -48   |
| Michigan                                                                    | MI | 10.820(9) | 0.359(8)   | 14.6(6)               | -51   | 20   | -46   |
| Minnesota                                                                   | MN | 8.727(11) | 0.376(6)   | 137(6)                | -43   | 19   | -41   |
| Mississippi                                                                 | MS | 7.88(2)   | 0.324(7)   | 36(1)                 | -34   | 13   | -20   |
| Missouri                                                                    | MO | 7.11(2)   | 0.447(18)  | 132(8)                | -38   | 14   | -32   |
| Montana                                                                     | MT | 4.390(5)  | 1.18(3)    | $1.1(7) \times 10^5$  | -36   | 13   | -15   |
| Nebraska                                                                    | NE | 8.75(8)   | 0.409(7)   | 233(12)               | -33   | 14   | -20   |
| Nevada                                                                      | NV | 7.08(2)   | 0.467(16)  | 149(9)                | -50   | 18   | -38   |
| New Hampshire                                                               | NH | 8.704(4)  | 0.285(2)   | 18.8(3)               | -42   | 18   | -37   |
| New Jersey                                                                  | NJ | 11.340(5) | 0.493(7)   | 127(4)                | -52   | 23   | -47   |
| New Mexico                                                                  | NM | 8.06(2)   | 0.346(7)   | 59(2)                 | -39   | 15   | -33   |
| New York                                                                    | NY | 12.530(3) | 0.514(6)   | 110(4)                | -53   | 22   | -51   |
| North Carolina                                                              | NC | 10.73(3)  | 0.1100(16) | 3.55(3)               | -38   | 14   | -28   |
| North Dakota                                                                | ND | 5.22(1)   | 0.358(6)   | 151(6)                | -32   | 16   | -25   |
| Ohio                                                                        | OH | 9.993(14) | 0.310(7)   | 21.4(7)               | -42   | 16   | -30   |
| Oklahoma                                                                    | OK | 6.45(3)   | 0.345(14)  | 45(3)                 | -36   | 13   | -27   |
| Oregon                                                                      | OR | 6.68(2)   | 0.53(2)    | $2.8(3) \times 10^2$  | -42   | 15   | -37   |
| Pennsylvania                                                                | PA | 9.8(1)    | 0.387(9)   | 45(3)                 | -46   | 19   | -43   |
| Rhode Island                                                                | RI | 7.155(5)  | 0.464(6)   | $2.7(1) \times 10^2$  | -43   | 18   | -38   |
| South Carolina                                                              | SC | 9.21(3)   | 0.376(15)  | 39(3)                 | -36   | 13   | -25   |
| South Dakota                                                                | SD | 6.041(12) | 0.93(2)    | $2.1(2) \times 10^5$  | -31   | 14   | -13   |
| Tennessee                                                                   | TN | 6.99(3)   | 0.290(9)   | 25(1)                 | -38   | 14   | -30   |
| Texas                                                                       | TX | 9.79(4)   | 0.379(16)  | 48(3)                 | -41   | 17   | -38   |
| Utah                                                                        | UT | 9.69(4)   | 0.320(12)  | 20.4(7)               | -41   | 16   | -23   |
| Vermont                                                                     | VT | 4.662(5)  | 1.03(2)    | $1.6(2) \times 10^5$  | -47   | 18   | -48   |
| Virginia                                                                    | VA | 10.64(1)  | 0.264(3)   | 16.0(4)               | -42   | 17   | -35   |
| Washington                                                                  | WA | 7.896(13) | 0.382(9)   | 18(2)                 | -48   | 18   | -32   |
| West Virginia                                                               | WV | 8.04(4)   | 0.33(2)    | 26(2)                 | -37   | 13   | -28   |
| Wisconsin                                                                   | WI | 8.93(4)   | 0.204(6)   | 7.7(2)                | -39   | 17   | -31   |
| Wyoming                                                                     | WY | 7.60(4)   | 0.296(15)  | 20(1)                 | -33   | 13   | -10   |

**Table T3. First wave fits and average mobility reductions in the US. Same as Table T1.**

| Fit parameters: two-gamma function parameters in the US |    |           |            |            |                       |            |
|---------------------------------------------------------|----|-----------|------------|------------|-----------------------|------------|
| State                                                   |    | $a$       | $\gamma_b$ | $\gamma_c$ | $b$                   | $\Delta t$ |
| Alaska                                                  | AK | 6.219(6)  | 1.28(8)    | 0.80(2)    | $2.9(3) \times 10^6$  | 1.52(8)    |
| Arizona                                                 | AZ | 8.87(7)   | 0.48(3)    | 0.186(6)   | $3.7(3) \times 10^3$  | 2.87(6)    |
| Arkansas                                                | AR | 7.9(2)    | 0.9(4)     | 0.33(3)    | $2.2(8) \times 10^4$  | 1.2(3)     |
| California                                              | CA | 8.80(5)   | 0.41(3)    | 0.179(6)   | $1.5(2) \times 10^2$  | 3.6(1)     |
| Colorado                                                | CO | 8.056(9)  | 0.63(6)    | 0.301(5)   | $1.7(2) \times 10^3$  | 2.7(2)     |
| Connecticut                                             | CT | 9.156(4)  | 0.480(8)   | 0.333(7)   | 215(8)                | 5.3(2)     |
| Delaware                                                | DE | 7.596(7)  | 0.59(5)    | 0.379(6)   | $2.1(3) \times 10^3$  | 3.6(2)     |
| Florida                                                 | FL | 10.16(5)  | 0.51(3)    | 0.172(9)   | $2.6(2) \times 10^2$  | 3.55(7)    |
| Georgia                                                 | GA | 11.40(2)  | 0.45(2)    | 0.228(6)   | 126(6)                | 3.86(8)    |
| Hawaii                                                  | HI | 6.586(7)  | 0.91(2)    | 0.7(2)     | $2.89(9) \times 10^4$ | 4.9(4)     |
| Idaho                                                   | ID | 7.95(2)   | 1.23(5)    | 0.31(2)    | $2.6(3) \times 10^6$  | 2.66(3)    |
| Illinois                                                | IL | 9.07(3)   | 0.53(4)    | 0.283(6)   | $6.3(6) \times 10^2$  | 2.8(1)     |
| Indiana                                                 | IN | 8.378(8)  | 0.62(3)    | 0.293(4)   | $1.9(3) \times 10^3$  | 3.01(6)    |
| Iowa                                                    | IA | 10.3(1)   | 0.33(2)    | 0.18(2)    | 62(2)                 | 7.38(5)    |
| Kansas                                                  | KS | 9.14(9)   | 0.6(6)     | 0.33(2)    | $1(1) \times 10^3$    | 1.9(1.3)   |
| Kentucky                                                | KY | 6.66(9)   | 0.40(3)    | 0.5(1)     | 130(6)                | 6.9(6)     |
| Louisiana                                               | LA | 8.65(3)   | 0.91(3)    | 0.31(3)    | $3.7(2) \times 10^4$  | 3.35(4)    |
| Maine                                                   | ME | 7.279(9)  | 0.53(6)    | 0.180(3)   | $5.7(7) \times 10^3$  | 2.6(2)     |
| Maryland                                                | MD | 10.197(6) | 0.48(3)    | 0.277(3)   | $3.3(3) \times 10^2$  | 3.7(2)     |
| Massachusetts                                           | MA | 10.138(4) | 0.441(6)   | 0.339(6)   | 120(3)                | 5.8(2)     |
| Michigan                                                | MI | 10.902(6) | 0.47(2)    | 0.274(4)   | 66(2)                 | 2.55(7)    |
| Minnesota                                               | MN | 8.695(8)  | 0.23(2)    | 0.400(5)   | 16(1)                 | 4.9(2)     |
| Mississippi                                             | MS | 8.00(2)   | 0.50(4)    | 0.284(6)   | $4.0(3) \times 10^2$  | 2.9(2)     |
| Missouri                                                | MO | 7.32(3)   | 0.66(3)    | 0.30(2)    | $2.9(2) \times 10^3$  | 3.07(7)    |
| Montana                                                 | MT | 4.389(6)  | 1.18(3)    | 0.767(0)   | $1.33(9) \times 10^6$ | 7.7(0)     |
| Nebraska                                                | NE | 8.748(9)  | 0.36(9)    | 0.411(8)   | $1.2(4) \times 10^2$  | 4(2)       |
| Nevada                                                  | NV | 7.24(2)   | 0.73(3)    | 0.333(9)   | $5.2(4) \times 10^3$  | 2.89(5)    |
| New Hampshire                                           | NH | 8.705(4)  | 0.284(3)   | 0.095(0)   | 19.5(3)               | 19(0)      |
| New Jersey                                              | NJ | 11.361(3) | 0.71(2)    | 0.447(4)   | $2.3(1) \times 10^3$  | 2.83(6)    |
| New Mexico                                              | NM | 8.18(3)   | 0.49(3)    | 0.306(6)   | $4.8(4) \times 10^2$  | 3.6(1)     |
| New York                                                | NY | 12.529(4) | 0.513(7)   | 0.0855(0)  | 115(3)                | 18(0)      |
| North Carolina                                          | NC | 10.88(3)  | 0.28(3)    | 0.103(1)   | 43(4)                 | 3.9(2)     |
| North Dakota                                            | ND | 5.26(2)   | 0.45(3)    | 0.331(8)   | $7.0(8) \times 10^3$  | 4.9(3)     |
| Ohio                                                    | OH | 10.18(3)  | 0.351(7)   | 0.222(8)   | 46(2)                 | 5.29(9)    |
| Oklahoma                                                | OK | 6.71(3)   | 0.68(3)    | 0.230(7)   | $4.7(4) \times 10^3$  | 3.17(5)    |
| Oregon                                                  | OR | 7.02(5)   | 0.70(3)    | 0.30(2)    | $2.0(2) \times 10^3$  | 2.80(6)    |
| Pennsylvania                                            | PA | 9.942(5)  | 0.60(2)    | 0.296(4)   | $9.5(4) \times 10^2$  | 3.88(4)    |
| Rhode Island                                            | RI | 7.195(4)  | 0.533(7)   | 0.384(6)   | $8.4(3) \times 10^2$  | 5.47(8)    |
| South Carolina                                          | SC | 9.57(5)   | 0.50(2)    | 0.23(2)    | $2.7(2) \times 10^2$  | 3.17(7)    |
| South Dakota                                            | SD | 6.04(2)   | 0.93(3)    | 0.333(0)   | $2.4(2) \times 10^5$  | 8.7(0)     |
| Tennessee                                               | TN | 7.3(2)    | 0.25(2)    | 0.18(4)    | 18.0(7)               | 6.6(3)     |
| Texas                                                   | TX | 10.56(9)  | 0.43(2)    | 0.19(1)    | 147(5)                | 3.79(4)    |
| Utah                                                    | UT | 10.01(4)  | 0.48(6)    | 0.232(6)   | 208(8)                | 2.89(5)    |
| Vermont                                                 | VT | 4.75(2)   | 0.98(3)    | 0.36(6)    | $1.06(5) \times 10^6$ | 3.72(6)    |
| Virginia                                                | VA | 10.67(1)  | 0.43(6)    | 0.256(4)   | $1.7(3) \times 10^2$  | 3.4(3)     |
| Washington                                              | WA | 8.20(2)   | 0.349(5)   | 0.204(5)   | 15.3(2)               | 2.36(4)    |
| West Virginia                                           | WV | 9.4(5)    | 0.35(4)    | 0.09(2)    | 67(5)                 | 4.15(8)    |
| Wisconsin                                               | WI | 9.13(3)   | 0.45(4)    | 0.176(4)   | $2.2(2) \times 10^2$  | 2.6(1)     |
| Wyoming                                                 | WY | 7.9(3)    | 0.25(4)    | 0.17(7)    | 13.0(7)               | 7.3(5)     |

**Table T4. First wave fits for the two-gamma model for the US. Same as Table T2.**
